# Supplementary material
Source: PubMed Central journal article supplement (PMC6743447)
Supplement: heartasia-2018-011176supp001.pdf [file heartasia-2018-011176supp001.pdf]

**Statin adherence and persistence on secondary prevention of cardiovascular disease in Taiwan****Supplementary: Characteristics of ASCVD hospital discharge patients and patients initiated a statin within 90-day of their discharge**

| Variable                                   | initiated a statin |      | not initiated statin |      | total New-onset ASCVD |      |
|--------------------------------------------|--------------------|------|----------------------|------|-----------------------|------|
| <b>Number of events</b>                    | 185,252            | 100% | 318,895              | 100% | 504,147               | 100% |
| <b>Age [mean, SD]</b>                      | [65.4, 12.0]       |      |                      |      | [68.7 (12.8)]         |      |
| Male                                       | 122,881            | 66%  | 201,550              | 63%  | 324,431               | 64%  |
| Female                                     | 62,371             | 34%  | 117,345              | 37%  | 179,716               | 36%  |
| <b>Statin use during hospitalization</b>   | 151,020            | 82%  | 33,717               | 11%  | 184,737               | 37%  |
| <b>Previous use of statins</b>             | 87,191             | 47%  | 46,298               | 15%  | 133,489               | 26%  |
| <b>Diagnosis of ASCVD events</b>           |                    |      |                      |      |                       |      |
| Ischemic stroke                            | 74,753             | 40%  | 200,320              | 63%  | 275,073               | 55%  |
| Acute myocardial infarction w/o PTCA/CABG  | 9,699              | 5%   | 32,484               | 10%  | 42,183                | 8%   |
| Acute myocardial infarction with PTCA/CABG | 33,021             | 18%  | 25,744               | 8%   | 58,765                | 12%  |
| Stable CHD receiving revascularization     | 67,779             | 37%  | 60,347               | 19%  | 128,126               | 25%  |
| <b>Examinations during hospitalization</b> |                    |      |                      |      |                       |      |
| Lipid exam                                 | 163,329            | 88%  | 251,872              | 79%  | 415,201               | 82%  |
| EKG exam                                   | 146,867            | 79%  | 228,737              | 72%  | 375,604               | 75%  |
| <b>Examinations 1 year before ASCVD</b>    |                    |      |                      |      |                       |      |
| <b>Lipid exam</b>                          |                    |      |                      |      |                       |      |
| Number [mean, SD]                          | [1.59, 1.78]       |      |                      |      | [1.31 (1.68)]         |      |
| 0 time                                     | 65,378             | 35%  | 151,572              | 48%  | 216,950               | 43%  |
| 1 time                                     | 40,545             | 22%  | 74,870               | 23%  | 115,415               | 23%  |
| ≥ 2 times                                  | 79,329             | 43%  | 92,453               | 29%  | 171,782               | 34%  |
| <b>EKG exam</b>                            |                    |      |                      |      |                       |      |
| Number [mean, SD]                          | [1.23, 1.72]       |      |                      |      | [1.33 (1.85)]         |      |
| 0 time                                     | 75,807             | 41%  | 127,280              | 40%  | 203,087               | 40%  |
| 1 time                                     | 54,008             | 29%  | 87,375               | 27%  | 141,383               | 28%  |
| ≥ 2 times                                  | 55,437             | 30%  | 104,240              | 33%  | 159,677               | 32%  |
| <b>One year before ASCVD</b>               |                    |      |                      |      |                       |      |
| <b>Comorbidities</b>                       |                    |      |                      |      |                       |      |
| Hypertension                               | 126,530            | 68%  | 24,307               | 8%   | 150,837               | 30%  |
| Ischemic heart disease                     | 87,031             | 47%  | 113,128              | 35%  | 200,159               | 40%  |

|                                                    |              |     |         |     |               |     |
|----------------------------------------------------|--------------|-----|---------|-----|---------------|-----|
| Hyperlipidemia                                     | 81,655       | 44% | 263,997 | 83% | 345,652       | 69% |
| Diabetes                                           | 76,390       | 41% | 119,956 | 38% | 196,346       | 39% |
| COPD                                               | 18,112       | 10% | 23,985  | 8%  | 42,097        | 8%  |
| Renal failure                                      | 15,988       | 9%  | 35,822  | 11% | 51,810        | 10% |
| Liver failure                                      | 14,004       | 8%  | 52,415  | 16% | 66,419        | 13% |
| Cancer                                             | 8,877        | 5%  | 23,869  | 7%  | 32,746        | 6%  |
| Depression                                         | 8,658        | 5%  | 20,522  | 6%  | 29,180        | 6%  |
| Transient ischemic attack                          | 7,512        | 4%  | 16,303  | 5%  | 23,815        | 5%  |
| Dementia                                           | 4,702        | 3%  | 22,104  | 7%  | 26,806        | 5%  |
| <b>Charlson's comorbidity score [mean, SD]</b>     | [1.79, 1.81] |     |         |     | [2.17 (2.06)] |     |
| <b>Medications</b>                                 |              |     |         |     |               |     |
| Antiplatelet agents                                | 119,947      | 65% | 177,558 | 56% | 297,505       | 59% |
| CCBs                                               | 104,848      | 57% | 184,030 | 58% | 288,878       | 57% |
| β-blockers                                         | 92,994       | 50% | 138,089 | 43% | 231,083       | 46% |
| ARBs                                               | 72,550       | 39% | 111,208 | 35% | 183,758       | 36% |
| OADs                                               | 68,073       | 37% | 102,016 | 32% | 170,089       | 34% |
| Diuretics                                          | 56,981       | 31% | 119,584 | 37% | 176,565       | 35% |
| ACEIs                                              | 45,236       | 24% | 79,385  | 25% | 124,621       | 25% |
| Insulin                                            | 23,958       | 13% | 42,739  | 13% | 66,697        | 13% |
| Anticoagulants                                     | 18,080       | 10% | 31,438  | 10% | 49,518        | 10% |
| Digitalis                                          | 7,514        | 4%  | 24,867  | 8%  | 32,381        | 6%  |
| <b>At index statin prescription</b>                |              |     |         |     |               |     |
| <b>Healthcare organization accreditation level</b> |              |     |         |     |               |     |
| Medical center                                     | 95,326       | 51% | 137,247 | 43% | 232,573       | 46% |
| Regional hospital                                  | 58,111       | 31% | 116,544 | 37% | 174,655       | 35% |
| District hospital                                  | 17,129       | 9%  | 52,649  | 17% | 69,778        | 14% |
| Other hospital                                     | 10,440       | 6%  | 16,701  | 5%  | 27,141        | 5%  |
| <b>Geographic location</b>                         |              |     |         |     |               |     |
| Taipei region                                      | 62,979       | 34% | 94,307  | 30% | 157,286       | 31% |
| Northern region                                    | 22,723       | 12% | 44,378  | 14% | 67,101        | 13% |
| Central region                                     | 32,740       | 18% | 63,271  | 20% | 96,011        | 19% |
| Southern region                                    | 30,274       | 16% | 56,708  | 18% | 86,982        | 17% |
| Kao-Ping region                                    | 30,730       | 17% | 50,980  | 16% | 81,710        | 16% |
| Eastern region                                     | 5,806        | 3%  | 9,251   | 3%  | 15,057        | 3%  |

**Physician Specialty**

---

|                                             |        |     |         |     |         |     |
|---------------------------------------------|--------|-----|---------|-----|---------|-----|
| Cardiovascular medicine                     | 96,018 | 52% | 102,892 | 32% | 198,910 | 39% |
| Cardiovascular surgery                      | 7,540  | 4%  | 13,170  | 4%  | 20,710  | 4%  |
| Neurology                                   | 53,050 | 29% | 140,592 | 44% | 193,642 | 38% |
| Internal medicine (including endocrinology) | 21,697 | 12% | 39,494  | 12% | 61,191  | 12% |
| Family medicine                             | 2,971  | 2%  | 216     | 0%  | 3,187   | 1%  |
| Others                                      | 3,976  | 2%  | 22,531  | 7%  | 26,507  | 5%  |

---
